# Supplementary material for: Transcriptome analysis of Tamarix ramosissima leaves in response to NaCl stress
Source: PLoS One. 2022 Mar 31;17(3):e0265653. doi: 10.1371/journal.pone.0265653 (PMC8970367; doi:10.1371/journal.pone.0265653)
Supplement: S1 Data — (XLSX) [file pone.0265653.s002.xlsx]

## Sheet: Figure.2
Figure.2 Changes of SOD, POD and CAT enzyme activities in leaves of T. ramosissima under salt stress
SOD activity		standard deviations		standard deviations
48h	22.42	1.55	25.89	1.36
168h	24.41	1.5	33.86	2.44
--	--	--	--	--
POD activity
48h	5.65	0.3	6.88	0.3
168h	5.97	0.2	8.53	0.7
--	--	--	--	--
CAT activity
48h	81.32	4.37	84.44	5.12
168h	82.08	5.47	90.24	6.21

## Sheet: Figure.4
Figure.4 Analysis of DEGs
Comparison group	up	down
CK-0h v.s. NaCl-48h	6374	5380
CK-0h v.s. NaCl-168h	2542	5226

## Sheet: Figure.7
Figure.7 Antioxidant mechanism related genes under NaCl treatment in T. ramosissima
	up	down
CK-0h v.s. NaCl-48h	--	--
SOD	1	3
POD	4	4
CAT	4	0
APX	3	2
GPX	0	1
GST	7	9
GR	2	0
--
--
CK-0h v.s. NaCl-168h
SOD	2	2
POD	2	6
CAT	3	1
APX	3	2
GPX	0	1
GST	3	12
GR	2	0

## Sheet: Supplemental Figure 1
Supplemental Figure 1: Verification of DEGs by qRT-PCR.
	qRT-PCR verification value	standard deviations	relative expression	standard deviations
Unigene0104732
CK-0h	1.02773	0.28594	16.87	0.75714
NaCl-48h	3.49737	0.27477	31.4867	1.35844
NaCl-168h	1.03965	0.1035	18.11	0.3269
--	--	--	--	--
Unigene0028215	--	--	--	--
CK-0h	1.00309	0.09487	11.01	0.56166
NaCl-48h	0.82471	0.13738	5.84333	0.28941
NaCl-168h	0.28808	0.02008	2.99667	0.74023
--	--	--	--	--
Unigene0083695	--	--
CK-0h	1.00021	0.02492	32.635	0.355
NaCl-48h	1.74947	0.12075	33.32	0.54
NaCl-168h	1.39306	0.12123	28.33	0.26
--	--	--	--	--
Unigene0069097	--	--
CK-0h	1.00526	0.12284	12.38	0.17664
NaCl-48h	2.43173	0.12741	31.37	2.02392
NaCl-168h	1.85931	0.15044	28.1867	1.74288
--	--	--	--	--
Unigene0090596	--	--	--	--
CK-0h	1.00341	0.10033	7.40333	0.53854
NaCl-48h	0.31501	0.04021	1.26333	0.0411
NaCl-168h	0.65223	0.13692	2.99	0.10708
--	--	--	--	--
Unigene0024962	--	--	--	--
CK-0h	1.00528	0.12667	13.78	0.45321
NaCl-48h	1.56119	0.1669	21.44	0.67072
NaCl-168h	1.57158	0.13887	22.27	0.4777
--	--	--	--	--
Unigene0007135	--	--	--	--
CK-0h	1.00319	0.09614	392.587	18.8446
NaCl-48h	0.34383	0.03399	97.3467	4.64747
NaCl-168h	0.56587	0.02409	152.087	7.5403
--	--	--	--	--
Unigene0088781	--	--
CK-0h	1.00165	0.07032	18.9467	1.22426
NaCl-48h	0.20943	0.02441	8.43667	0.13474
NaCl-168h	0.90506	0.07323	13.2133	0.44124
